# Supplementary material
Source: publisher figshare collection journal article supplement (https://plos.figshare.com/articles/dataset/_/6836366)
Supplement: Supplementary file [file 1]

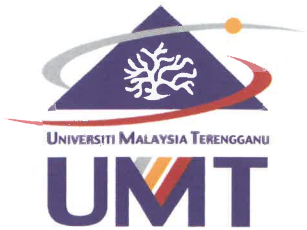

# UNIVERSITI MALAYSIA TERENGGANU

21030 Kuala Terengganu,  
Terengganu, Malaysia  
Web : [www.umat.edu.my](http://www.umat.edu.my)

**INSTITUT OSEANOGRAFI DAN SEKITARAN**

Tel : 09-6683195 | Faks : 09-6692166

Higher Institution Centre of Excellence (HICoE) in Marine Science

Our Reference : UMT/INOS/P/2-2/0  
Date : 10 June 2018

**Dear Ms. MONIKA RUWAIMANA,**

REF: PUBLICATION IN PLOS ONE - ***THE ADVANTAGES OF USING DRONES OVER SPACE-BORNE IMAGERY IN THE MAPPING OF MANGROVE FORESTS***

I refer to your application for Ethical Biosecurity Committee regarding the above publication purpose - to support your data collected from Setiu wetlands (Terengganu) be publishable, I am pleased to inform you the authorities at the Institute of Oceanography and Environment (INOS), UMT, have approved the request.

Please be aware that the approval is conditional on following –

1. Ethical Biosecurity Committee will require a copy of the publication, upon its acceptance in the PLoS ONE

If you have any queries, please don't hesitate to contact the INOS authorities.

Thank you.

**"BERKHIDMAT UNTUK NEGARA"**

Your faithfully,

**ASSOCIATE PROF. DR. AIDY @ MOHAMED SHAWAL M MUSLIM**

Director

Institute of Oceanography and Environment

Universiti Malaysia Terengganu

☎ +06 09-668 3101

✉ [aidy@umat.edu.my](mailto:aidy@umat.edu.my)

c.c      1) File

**Ethical Biosecurity Committee**  
**Institute of Oceanography and Environment**  
**Universiti Malaysia Terengganu**

T145, 21030 Kuala Terengganu, Terengganu, Malaysia  
Ph. +60 9 668 4100, Fax: +60 9 669 2166

|                                                   |          |
|---------------------------------------------------|----------|
| Associate Prof. Dr. Aidy Mohamed Shawal B. Muslin | Chairman |
| Associate Prof. Dr. Suhaimi B. Suratman           | Member   |
| Associate Prof. Dr. Mohd Fadzil B. M. Akhir       | Member   |
| Associate Prof. Dr. Zianudin Bachok               | Member   |
| Associate Prof. Dr. Behara Satyanarayana          | Member   |
| Dr. Le Quang Dung                                 | Member   |
